# Supplementary material for: miR172 Regulates WUS during Somatic Embryogenesis in Arabidopsis via AP2
Source: MDPI journal article supplement (doi:10.3390/cells11040718), 2022-02-17
Supplement: s1 [file s1]

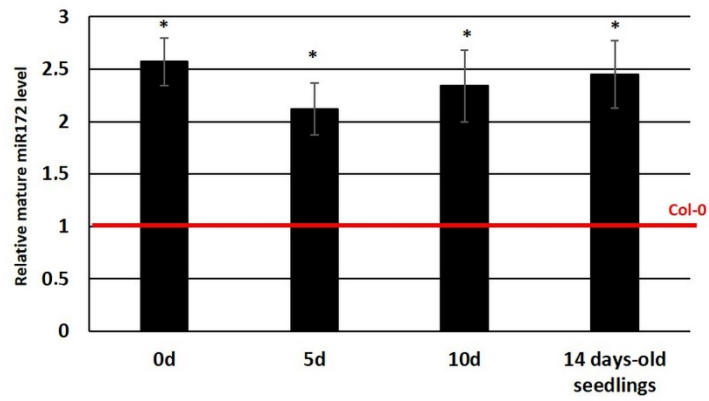

Figure S1. Level of mature miR172 in the embryogenic culture and 14-day-old seedlings of the 35S::MIR172D line. The relative miRNA level was normalised to an internal control (*At4g27090*) and calibrated to the WT (Col-0) culture of the same age (0d, 5d, and 10d) and 14-day-old seedlings. \* – value significantly different from the Col-0 culture of the same age ( $P < 0.05$ ;  $n = 3 \pm \text{SD}$ ) and 14-day-old seedlings.

Table S1: List of the primers that were used for the Real Time qPCR analysis.

| Gene                  | Primers sequence                                              |
|-----------------------|---------------------------------------------------------------|
| <i>TOE1</i>           | pF - AATAATCCCGCCGAGGGAAGAG<br>pR - AACAAATGGTGGTGGTTGTGGTC   |
| <i>TOE2</i>           | pF - TGGAGCAGCTTCATGGAAACATGG<br>pR - GCTTCCCTTCCCTCCATTGTACG |
| <i>TOE3</i>           | pF - CCGATAAAGAAGAGCCGACGTG<br>pR - TGTGCAGTGTCAAATCCACCTAAG  |
| <i>SMZ</i>            | pF - AAGGAGCCATGAAGTTTGGTG<br>pR - TGCTGATAAAAGGGAATCCTG      |
| <i>SNZ</i>            | pF - AATGAGCACAACGATCTCGAG<br>pR - GCCCATAGTAAAGGAAATGAG      |
| <i>AP2</i>            | pF - ATACTCCCAATTCAAACCACC<br>pR - TCAAGAAGGTCTCATGAGAGG      |
| <i>WUS</i>            | pF - TCACCATCATCACGGTGTTT<br>pR - AGAACAGTCTTGTTCCATAGA       |
| <i>AGL15</i>          | pF - CAAGGGCTTGAATCCTCTGA<br>pR - GTTGTTCTTGAGGCGTGAT         |
| <i>miR712</i>         | pR - CGGGCGGAGAATCTTGATGATG<br>pR - GTGCAGGGTCCGAGGT          |
| <i>WUS</i><br>TSS+300 | pF - GCCACAGCATCAGCATCATC<br>pR - CGACACGTGTAACCACCAGA        |
| <i>WUS</i><br>3'UTR   | pF - CATCATAGAGATAAAACGGTTGTCA<br>pR - TCGCTCGGGATTAAAGCTC    |

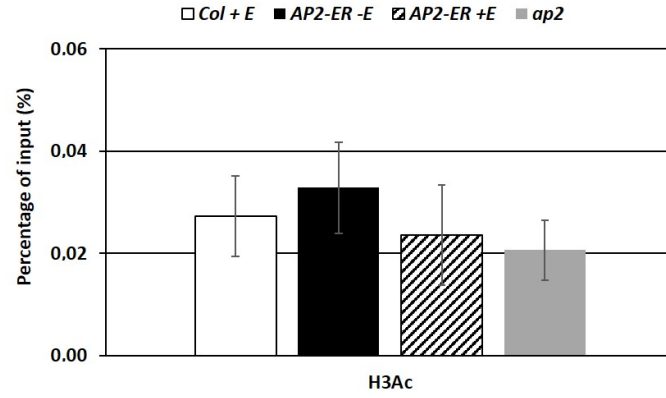

Figure S2. H3ac enrichment in the chromatin fragment that was bound to the 3'UTR of the *WUS* gene in the explants of Col-0 (WT), 35S::*AP2-ER* and *ap2*. *AP2* overexpression was induced with  $\beta$ -estradiol (+E). A statistical analysis indicated no differences between the compared combinations ( $P < 0.05$ ;  $n = 3 \pm \text{SD}$ ).

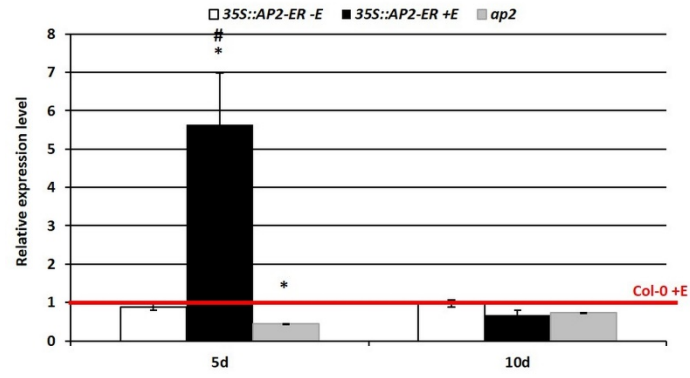

Figure S3: Expression analysis of *AGL15* in the SE culture in *AP2*-induced overexpressor line and the *ap2* mutant. The relative transcript level was normalised to an internal control (*At4g27090*) and calibrated to the WT (Col-0) culture of the same age. \* values significantly different from the Col-0 culture of the same age ( $P < 0.05$ ;  $n = 3 \pm \text{SD}$ ); # - values significantly different from the 35S::AP2-ER -E culture of the same age ( $P < 0.05$ ;  $n = 3 \pm \text{SD}$ ).
